# Supplementary material
Source: publisher site journal article supplement (https://www.dovepress.com/get_supplementary_file.php?f=384338.docx)
Supplement: Supplementary file 1 [file get_supplementary_file.php]

**Table S1** Variant histological subtypes of 595 patients treated with radical cystectomy.

| Urothelial carcinoma histology | Number of patients (%) |
| --- | --- |
| Pure Urothelial carcinoma | 478 (80.3%) |
| Variant histology | 117 (19.7%) |
| Squamous cell differentiation | 46 (7.7%) |
| Glandular | 44 (7.4%) |
| Multiple | 12 (2.0%) |
| Micropapillary | 4 (0.7%) |
| Signet ring cell | 4 (0.7%) |
| Sarcomatoid | 3 (0.5%) |
| Plasmacytoid | 3 (0.5%) |
| Neuroendocrine variant | 1 (0.2%) |

**Table S2** Results from receiver operating characteristic analysis.

| Variables | Cut-off value | Sensitivity | Specificity | Positive predictive value | Negative  Predictive value | Youden index |
| --- | --- | --- | --- | --- | --- | --- |
| LDH | 159.5 | 55.5% | 71.6% | 55.0% | 72.0% | 0.270 |
| Albumin | 39.6 | 45.9% | 71.6% | 50.2% | 67.9% | 0.174 |
| LAR | 3.8 | 60.3% | 69.4% | 55.2% | 73.6% | 0.297 |

**Abbreviations:** LAR, lactate dehydrogenase-to-albumin ratio; LDH, lactate dehydrogenase.

**Figure S1** ROC curves for the determination of the optimal cutoff level of LDH, albumin and LAR.


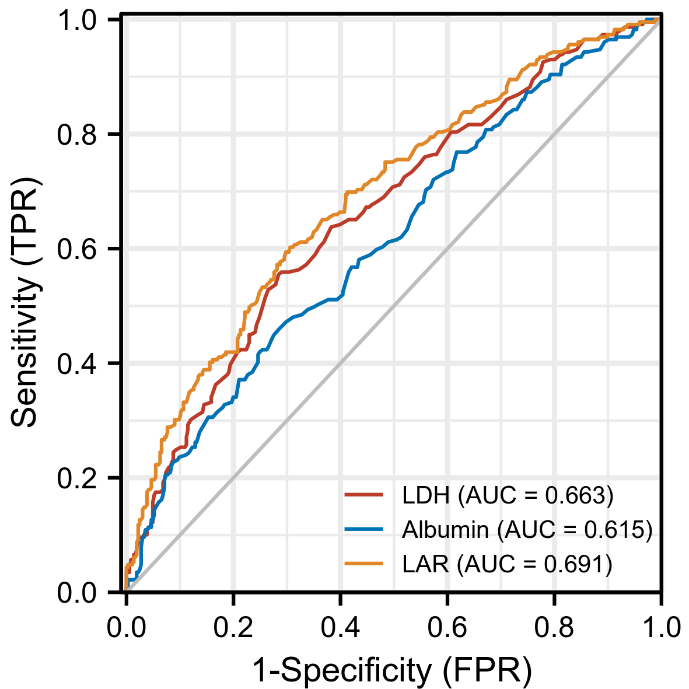


**Abbreviations:** ROC, receiver operating characteristic; LDH, lactate dehydrogenase; LAR, lactate dehydrogenase-to-albumin ratio; AUC: area under the curve; CI: confidence interval.
